# Supplementary material for: Four new silver phosphonates constructed from semi-rigid phosphonate ligands: synthesis, structure and properties
Source: Royal Society of Chemistry journal article supplement (doi:10.1039/c6ra21382k), 2016-01-01
Supplement: c6ra21382k1.pdf [file c6ra21382k1.pdf]

Supporting information

**Four New Silver Phosphonates Constructed from Semi-rigid Phosphonate ligands: Syntheses, Structures and Properties**

Xiaomin Hou<sup>a</sup> and Si-Fu Tang<sup>\*,b</sup>

<sup>a</sup>College of Life Science, Qingdao Agriculture University, Changcheng Road 700, Chengyang District, Qingdao 266109, China

<sup>b</sup>Qingdao Institute of Bioenergy and Bioprocess Technology, Chinese Academy of Sciences, Qingdao 266101, China.

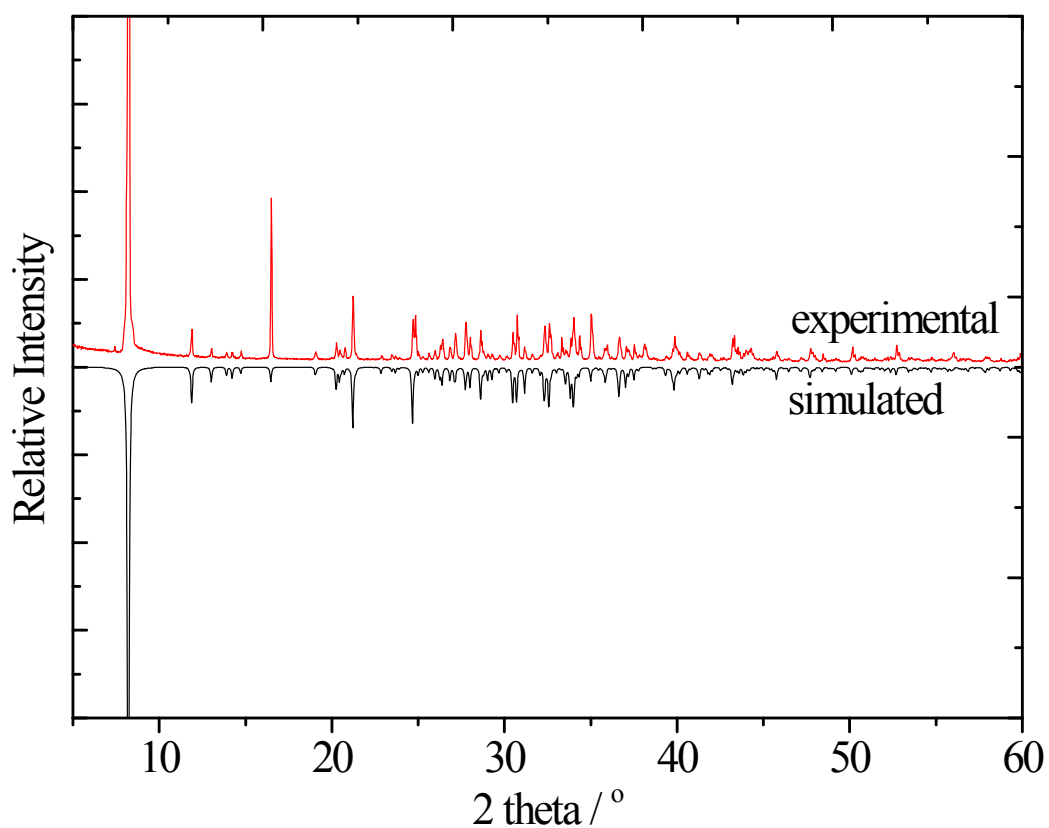

Fig. S1 Experimental and simulated powder X-ray diffraction patterns of compound 1.

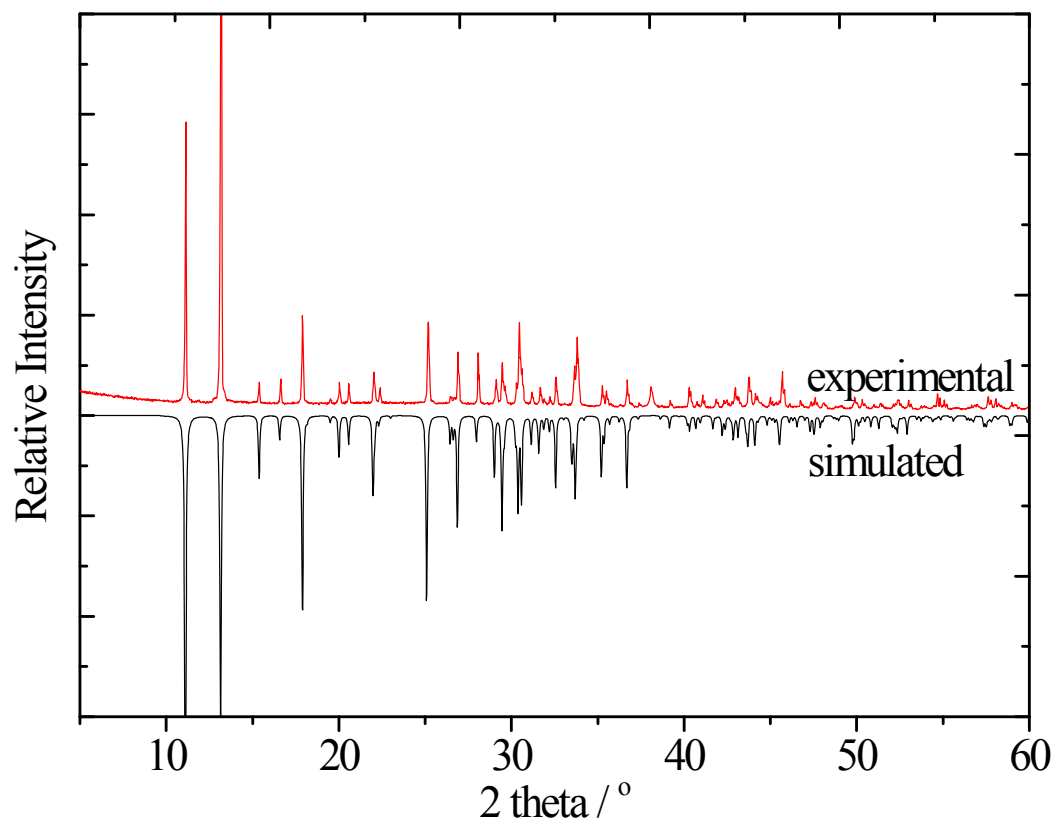

Fig. S2 Experimental and simulated powder X-ray diffraction patterns of compound 2.

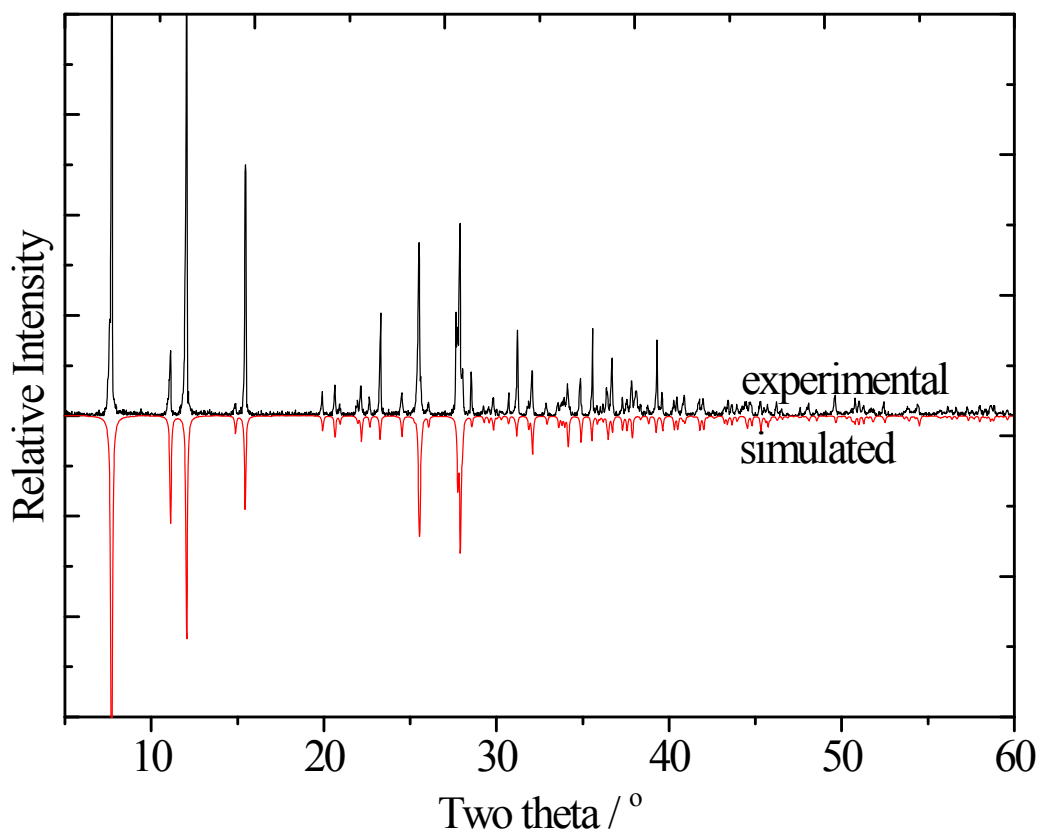

Fig. S3 Experimental and simulated powder X-ray diffraction patterns of compound **3**.

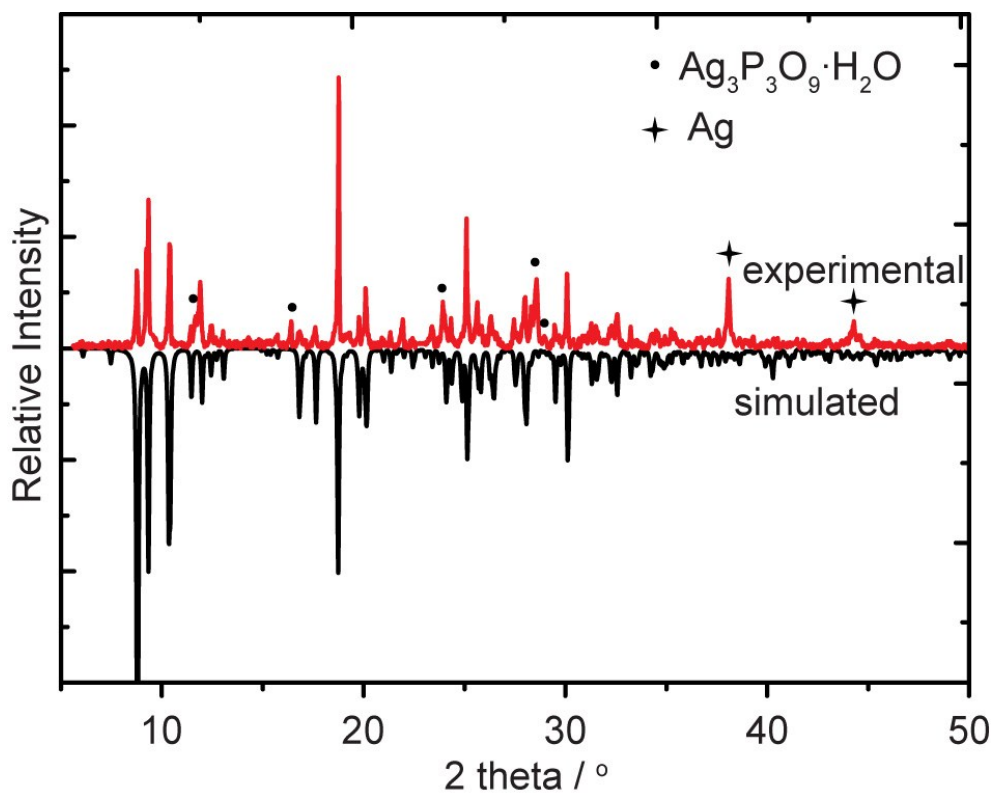

Fig. S4 Experimental and simulated powder X-ray diffraction patterns of compound **4**.

There are a few unexpected peaks ( $2\theta = 11.89, 16.43, 23.93, 28.57, 28.99^\circ$ , marked with •; and  $2\theta = 38.07, 44.29^\circ$ , marked with ✦) on the patterns of compound **4**. With the aid of JADE, these peaks could be ascribed to Ag (PDF: 04-0783) and  $\text{Ag}_3\text{P}_3\text{O}_9\cdot\text{H}_2\text{O}$  (PDF: 26-0955).

Table S1. Selected angles ( $^\circ$ ) in compounds **1-4**.

| Compound <b>1</b> |            |                   |            |
|-------------------|------------|-------------------|------------|
| O(8)#1-Ag(1)-O(1) | 113.09(13) | O(9)#4-Ag(2)-O(5) | 131.66(14) |

|                      |            |                       |            |
|----------------------|------------|-----------------------|------------|
| O(8)#1-Ag(1)-O(6)#2  | 150.14(13) | O(3)#5-Ag(2)-O(5)     | 94.48(14)  |
| O(1)-Ag(1)-O(6)#2    | 83.63(12)  | O(9)#4-Ag(2)-O(4)#6   | 87.81(14)  |
| O(8)#1-Ag(1)-O(6)#1  | 88.48(12)  | O(3)#5-Ag(2)-O(4)#6   | 112.78(13) |
| O(1)-Ag(1)-O(6)#1    | 110.36(12) | O(5)-Ag(2)-O(4)#6     | 95.37(13)  |
| O(6)#2-Ag(1)-O(6)#1  | 109.42(10) | O(3)#8-Ag(3)-O(6)     | 161.37(12) |
| O(8)#1-Ag(1)-O(5)#2  | 93.21(13)  | O(3)#8-Ag(3)-O(8)     | 101.38(13) |
| O(1)-Ag(1)-O(5)#2    | 103.27(12) | O(6)-Ag(3)-O(8)       | 96.31(12)  |
| O(6)#2-Ag(1)-O(5)#2  | 57.96(11)  | O(3)#8-Ag(3)-O(3)#9   | 80.90(13)  |
| O(6)#1-Ag(1)-O(5)#2  | 142.57(11) | O(6)-Ag(3)-O(3)#9     | 85.45(12)  |
| O(9)#4-Ag(2)-O(3)#5  | 128.43(12) | O(8)-Ag(3)-O(3)#9     | 119.02(13) |
| <b>Compound 2</b>    |            |                       |            |
| O(3)-Ag(1)-O(1)#1    | 121.16(13) | O(3)-Ag(1)-C(4)#1     | 140.35(15) |
| O(3)-Ag(1)-O(1)#2    | 93.87(14)  | O(1)#1-Ag(1)-C(4)#1   | 87.55(15)  |
| O(1)#1-Ag(1)-O(1)#2  | 110.23(9)  | O(1)#2-Ag(1)-C(4)#1   | 101.28(15) |
| <b>Compound 3</b>    |            |                       |            |
| O(1)-Ag(1)-O(2)#1    | 150.24(10) | O(2)#1-Ag(1)-N(1)     | 92.10(10)  |
| O(1)-Ag(1)-N(1)      | 114.45(11) |                       |            |
| O(1)-Ag(1)-Ag(1)#2   | 83.03(7)   | O(2)#1-Ag(1)-Ag(1)#1  | 79.18(7)   |
| O(2)#1-Ag(1)-Ag(1)#2 | 108.97(7)  | N(1)-Ag(1)-Ag(1)#1    | 170.32(8)  |
| N(1)-Ag(1)-Ag(1)#2   | 94.97(8)   | Ag(1)#2-Ag(1)-Ag(1)#1 | 91.870(18) |
| O(1)-Ag(1)-Ag(1)#1   | 73.17(7)   |                       |            |
| <b>Compound 4</b>    |            |                       |            |
| N(1)-Ag(1)-N(3)      | 175.73(16) | N(4)#1-Ag(2)-N(2)#1   | 160.02(16) |
| N(1)-Ag(1)-O(2)      | 99.97(15)  | N(4)#1-Ag(2)-O(8)     | 100.94(15) |
| N(3)-Ag(1)-O(2)      | 84.01(14)  | N(2)#2-Ag(2)-O(8)     | 90.80(14)  |
| N(1)-Ag(1)-Ag(2)     | 87.99(12)  | N(4)#1-Ag(2)-Ag(1)    | 97.04(12)  |
| N(3)-Ag(1)-Ag(2)     | 94.92(12)  | N(2)#2-Ag(2)-Ag(1)    | 102.88(11) |
| O(2)-Ag(1)-Ag(2)     | 68.68(12)  | O(8)-Ag(2)-Ag(1)      | 58.77(10)  |

Symmetry transformations used to generate equivalent atoms: For **1**: #1 -x+1, -y+1, -z+1; #2 x, y, z-1; #5 -x+2, -y+1, -z+1; #6 -x+2, -y+1, -z+2; #9 x, y, z+1. For **2**: #1 x, y-1, z; #2 -x+2, y-1/2, -z+1/2. For **3**: #1 -x+1, y+1/2, -z+3/2; #2 -x+1, y-1/2, -z+3/2 For **4**: #1 -x+2, -y, -z+1

Table S2. C-H...O interactions in compounds **3-4**.

|                   | C-H (Å) | H...O (Å) | C...O (Å) | < C-H...O (°) |
|-------------------|---------|-----------|-----------|---------------|
| <b>Compound 3</b> |         |           |           |               |

|                   |        |        |          |        |
|-------------------|--------|--------|----------|--------|
| C6-H6A···O2#1     | 0.9300 | 2.5800 | 3.236(5) | 128.00 |
| <b>Compound 4</b> |        |        |          |        |
| C1-H1A···O8       | 0.9300 | 2.5700 | 3.072(8) | 114.00 |
| C6-H6A···O3#1     | 0.9300 | 2.5300 | 3.294(7) | 140.00 |
| C10-H10A···O1     | 0.9300 | 2.5000 | 3.209(7) | 133.00 |
| C11-H11A···O2     | 0.9300 | 2.5900 | 3.094(9) | 114.00 |
| C16-H16A···O9#2   | 0.9300 | 2.4200 | 3.282(8) | 154.00 |
| C20-H20A···O7     | 0.9300 | 2.4500 | 3.251(8) | 145.00 |
| C25-H25A···O6#3   | 0.9300 | 2.5800 | 3.443(6) | 154.00 |
| C26-H26C···O3#4   | 0.9600 | 2.5700 | 3.425(7) | 148.00 |
| C29-H29A···O9#5   | 0.9700 | 2.3600 | 3.288(8) | 159.00 |

Symmetry transformations used to generate equivalent atoms: For **3**: #1: 1-x, -1-y, -z;  
For **4**: #1: 2-x, -y, 1-z; #2: 1-x, 1-y, -z; #3: 1+x, y, z; #4: -1+x, y, z; #5: m1-x, 1-y, 1-z;
